# Supplementary material
Source: PubMed Central journal article supplement (PMC7881835)
Supplement: NIHMS976280-supplement-1.pdf [file NIHMS976280-supplement-1.pdf]

Fig S1

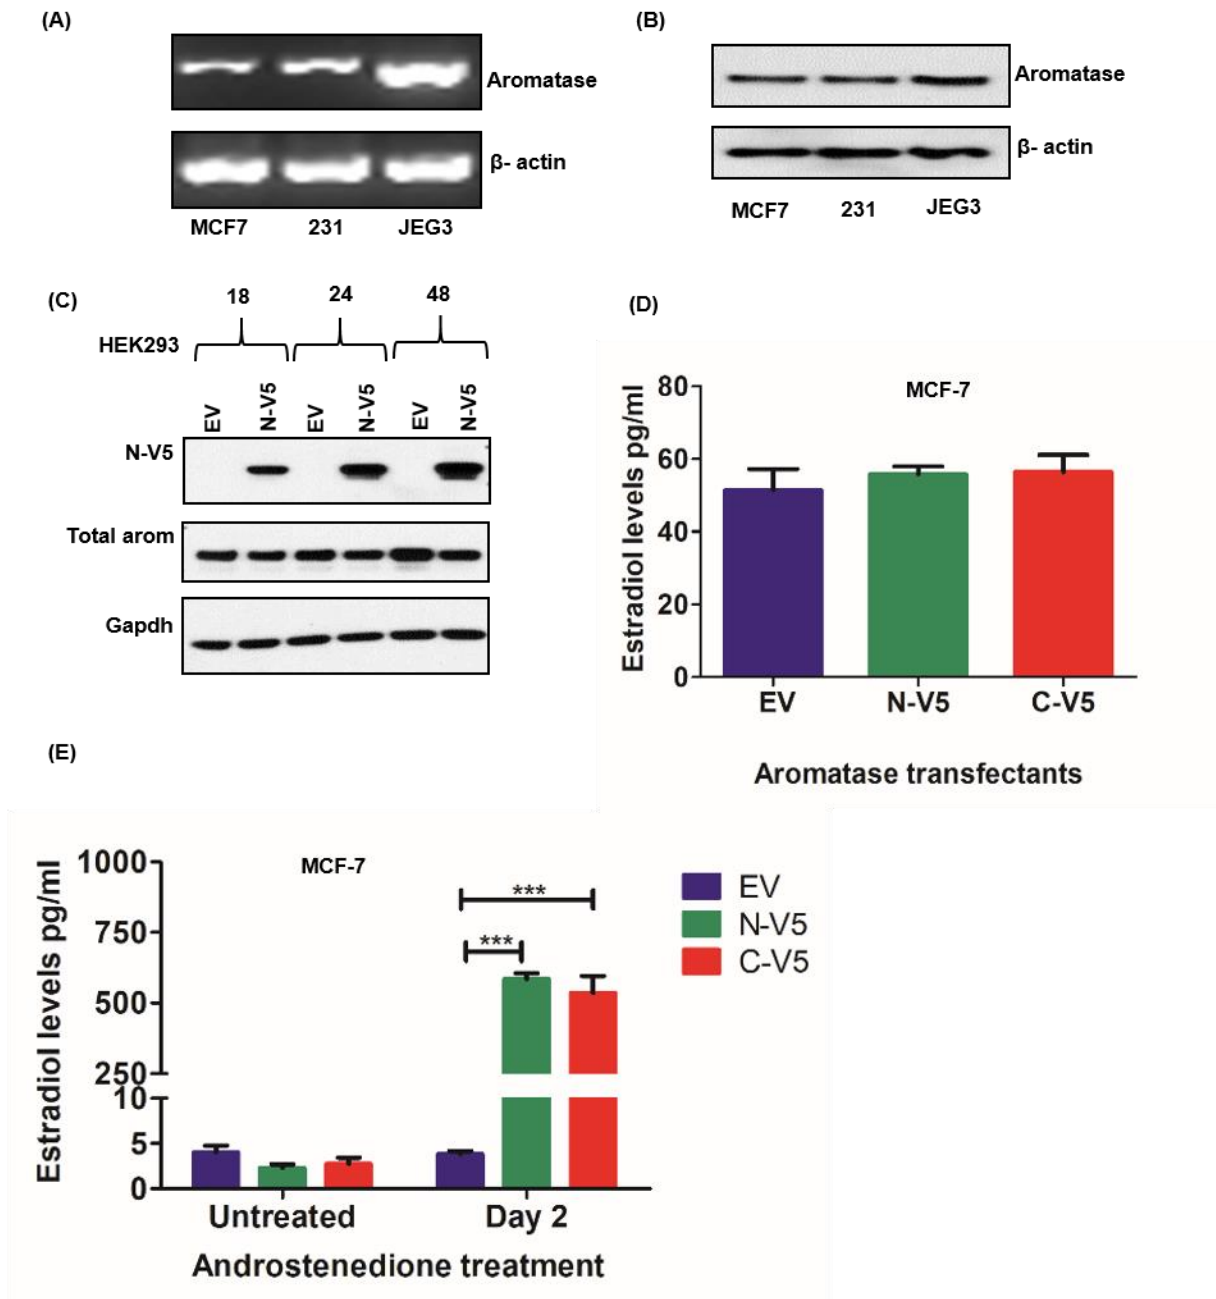

Supplementary Figure S1: Expression of endogenous aromatase protein and exogenous aromatase constructs in different cell lines and their effect on estradiol levels. (A) Transcript levels and (B) protein levels of aromatase in Estrogen Receptor positive MCF-7, triple negative

breast cancer cells MDA-MB 231 and placenta choriocarcinoma cancer cells JEG3. (C) Time course of N-V5-tagged aromatase-WT construct in HEK293 cells. (D) Estradiol levels without androgen substrate. (E) Estradiol levels with androstenedione for 2 days \*\*\* $p < 0.0001$  of biological triplicates.
